# Supplementary material for: Intraspecific Diversity and Pathogenicity of Bacillus thuringiensis Isolates from an Emetic Illness
Source: MDPI journal article supplement (doi:10.3390/toxins15020089), 2023-01-18
Supplement: s1 [file s1]

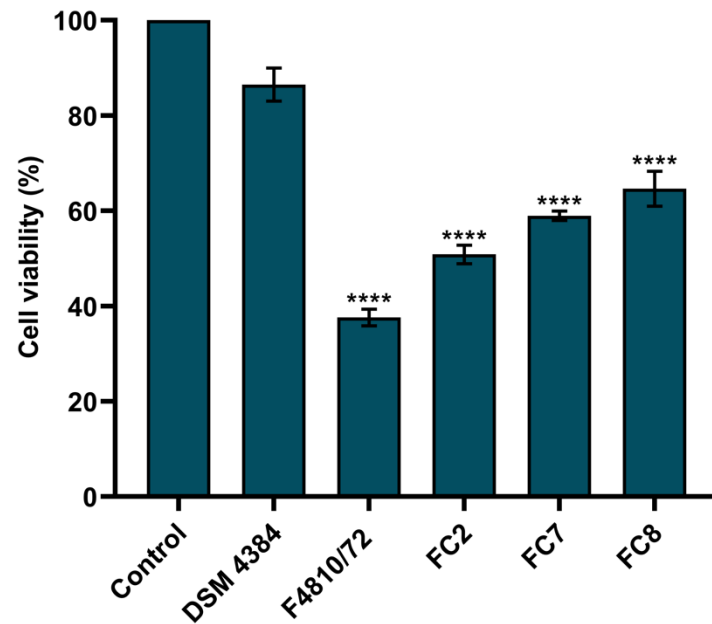

**Figure S1.** Caco-2 cell viability after treatment with heat-treated culture supernatants of emetic foodborne outbreak isolates. The MTT cytotoxicity test was conducted after 48 hours of exposure to 50% (v/v) (1/2 dilution) of the supernatants of isolates FC2, FC7, and FC8. DSM 4384 was used as a non-emetic strain control, which was non-toxic (cell viability > 80%) to Caco-2 cells. Error bars show  $\pm$  SD, with  $n = 3$ . The asterisk marks indicate a statistically significant difference in cytotoxicity resulting from each emetic strain (reference strain F4810/72 and emetic outbreak FC isolates) as compared to the non-emetic strain *B. cereus* DSM 4384 (one-way ANOVA/Tukey's multiple comparisons test,  $p < 0.0001$ ).
