# Supplementary material for: Intraspecific Diversity and Pathogenicity of Bacillus thuringiensis Isolates from an Emetic Illness
Source: MDPI journal article supplement (doi:10.3390/toxins15020089), 2023-01-18
Supplement: s1 [file s1]

**Table S1.** Positive biochemical characteristics of the emetic outbreak *B. thuringiensis* isolates tested using the API 20 and API 50 CH galleries.

| Isolate | Positive biochemical characteristics <sup>a</sup> |                     |                      |        |                 |                      |                   |                    |          |           |            |                     |           |         |         |         |              |           |             |        |          |
|---------|---------------------------------------------------|---------------------|----------------------|--------|-----------------|----------------------|-------------------|--------------------|----------|-----------|------------|---------------------|-----------|---------|---------|---------|--------------|-----------|-------------|--------|----------|
|         | Arginine dihydrolase                              | Citrate (Simmons' ) | Tryptophan deaminase | Indole | Voges Proskauer | Gelatin liquefaction | Nitrate reduction | Acid from Glycerol | D-Ribose | D-Glucose | D-Fructose | N-acetylglucosamine | Amygdalin | Arbutin | Esculin | Salicin | D-Cellobiose | D-Maltose | D-Trehalose | Starch | Glycogen |
| FC1     | 5                                                 | 0                   | 1                    | 1      | 1               | 5                    | 5                 | 1                  | 5        | 5         | 4          | 5                   | 0         | 2       | 5       | 4       | 1            | 5         | 5           | 5      | 5        |
| FC2     | 5                                                 | 2                   | 1                    | 1      | 1               | 5                    | 3                 | 1                  | 4        | 5         | 5          | 5                   | 0         | 3       | 4       | 4       | 1            | 5         | 5           | 5      | 5        |
| FC6     | 5                                                 | 3                   | 1                    | 0      | 3               | 5                    | 3                 | 1                  | 4        | 5         | 5          | 5                   | 1         | 5       | 5       | 5       | 5            | 5         | 5           | 5      | 5        |
| FC7     | 5                                                 | 1                   | 1                    | 0      | 3               | 5                    | 5                 | 1                  | 5        | 5         | 5          | 5                   | 1         | 5       | 5       | 5       | 4            | 5         | 5           | 5      | 5        |
| FC8     | 5                                                 | 2                   | 1                    | 0      | 2               | 5                    | 5                 | 1                  | 5        | 5         | 5          | 5                   | 1         | 5       | 5       | 5       | 4            | 5         | 5           | 5      | 5        |
| FC9     | 5                                                 | 2                   | 1                    | 0      | 3               | 5                    | 4                 | 1                  | 4        | 5         | 4          | 5                   | 1         | 5       | 5       | 5       | 4            | 5         | 5           | 5      | 5        |
| FC10    | 5                                                 | 3                   | 1                    | 0      | 4               | 5                    | 5                 | 1                  | 4        | 5         | 5          | 5                   | 1         | 5       | 5       | 5       | 4            | 5         | 5           | 5      | 5        |

<sup>a</sup>Scale recorded show the strength of reaction (5: strongest; 1: weakest; 0: negative); Tests scoring negative for all isolates are not listed.
